# Supplementary material for: Intestinal fungi are causally implicated in microbiome assembly and immune development in mice
Source: PubMed Central journal article supplement (PMC7244730; doi:10.1038/s41467-020-16431-1), 2020-05-22
Supplement: 41467_2020_16431_MOESM1_ESM.pdf [file 41467_2020_16431_MOESM1_ESM.pdf]

## **Supplementary Information**

**Intestinal fungi are causally implicated in microbiome assembly  
and immune development in mice.**

van Tilburg Bernardes *et al.* (2020)

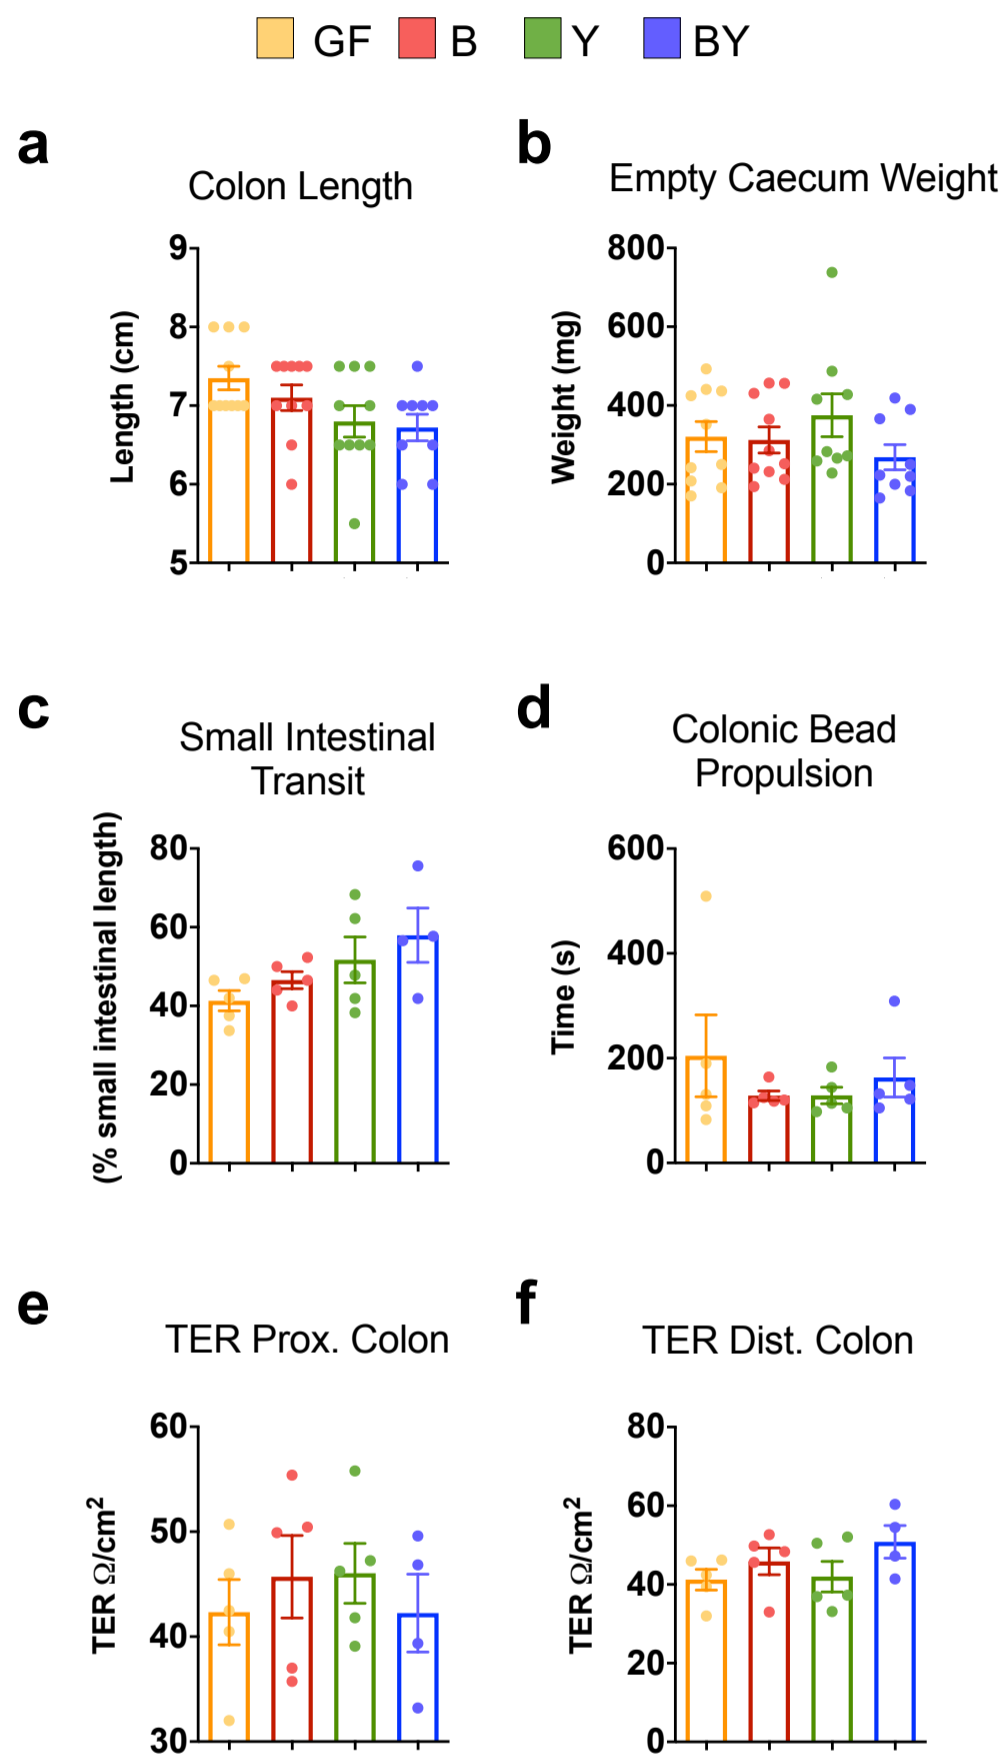

**Supplementary Fig. 1: Microbial colonization does not impact intestinal transit and colonic functionality.** (a) Large intestine length and (b) empty caecum weight of gnotobiotic dams. (c) Small intestine transit determined by movement of non-absorbable dye. (d) Large intestine transit determined by colonic bead propulsion. (e) Proximal and (f) distal colon paracellular permeability measured by electrical Transepithelial Resistance (TER). (a-f) Data expressed as mean  $\pm$  S.E.M.; color denotes colonization treatment (GF = yellow, B = red, Y = green, BY = royal blue); (a)  $N_{\text{GF}}=10$ ,  $N_{\text{B}}=10$ ,  $N_{\text{Y}}=10$ ,  $N_{\text{BY}}=9$ ; (b)  $N_{\text{GF}}=10$ ,  $N_{\text{B}}=10$ ,  $N_{\text{Y}}=9$ ,  $N_{\text{BY}}=9$ ; (c, e-f)  $N_{\text{GF}}=5$ ,  $N_{\text{B}}=5$ ,  $N_{\text{Y}}=5$ ,  $N_{\text{BY}}=4$ ; (d)  $N_{\text{GF}}=5$ ,  $N_{\text{B}}=5$ ,  $N_{\text{Y}}=5$ ,  $N_{\text{BY}}=5$ ; no statistically significant differences between groups (one-way ANOVA and Tukey posthoc tests). Source data are provided as a Source Data file.

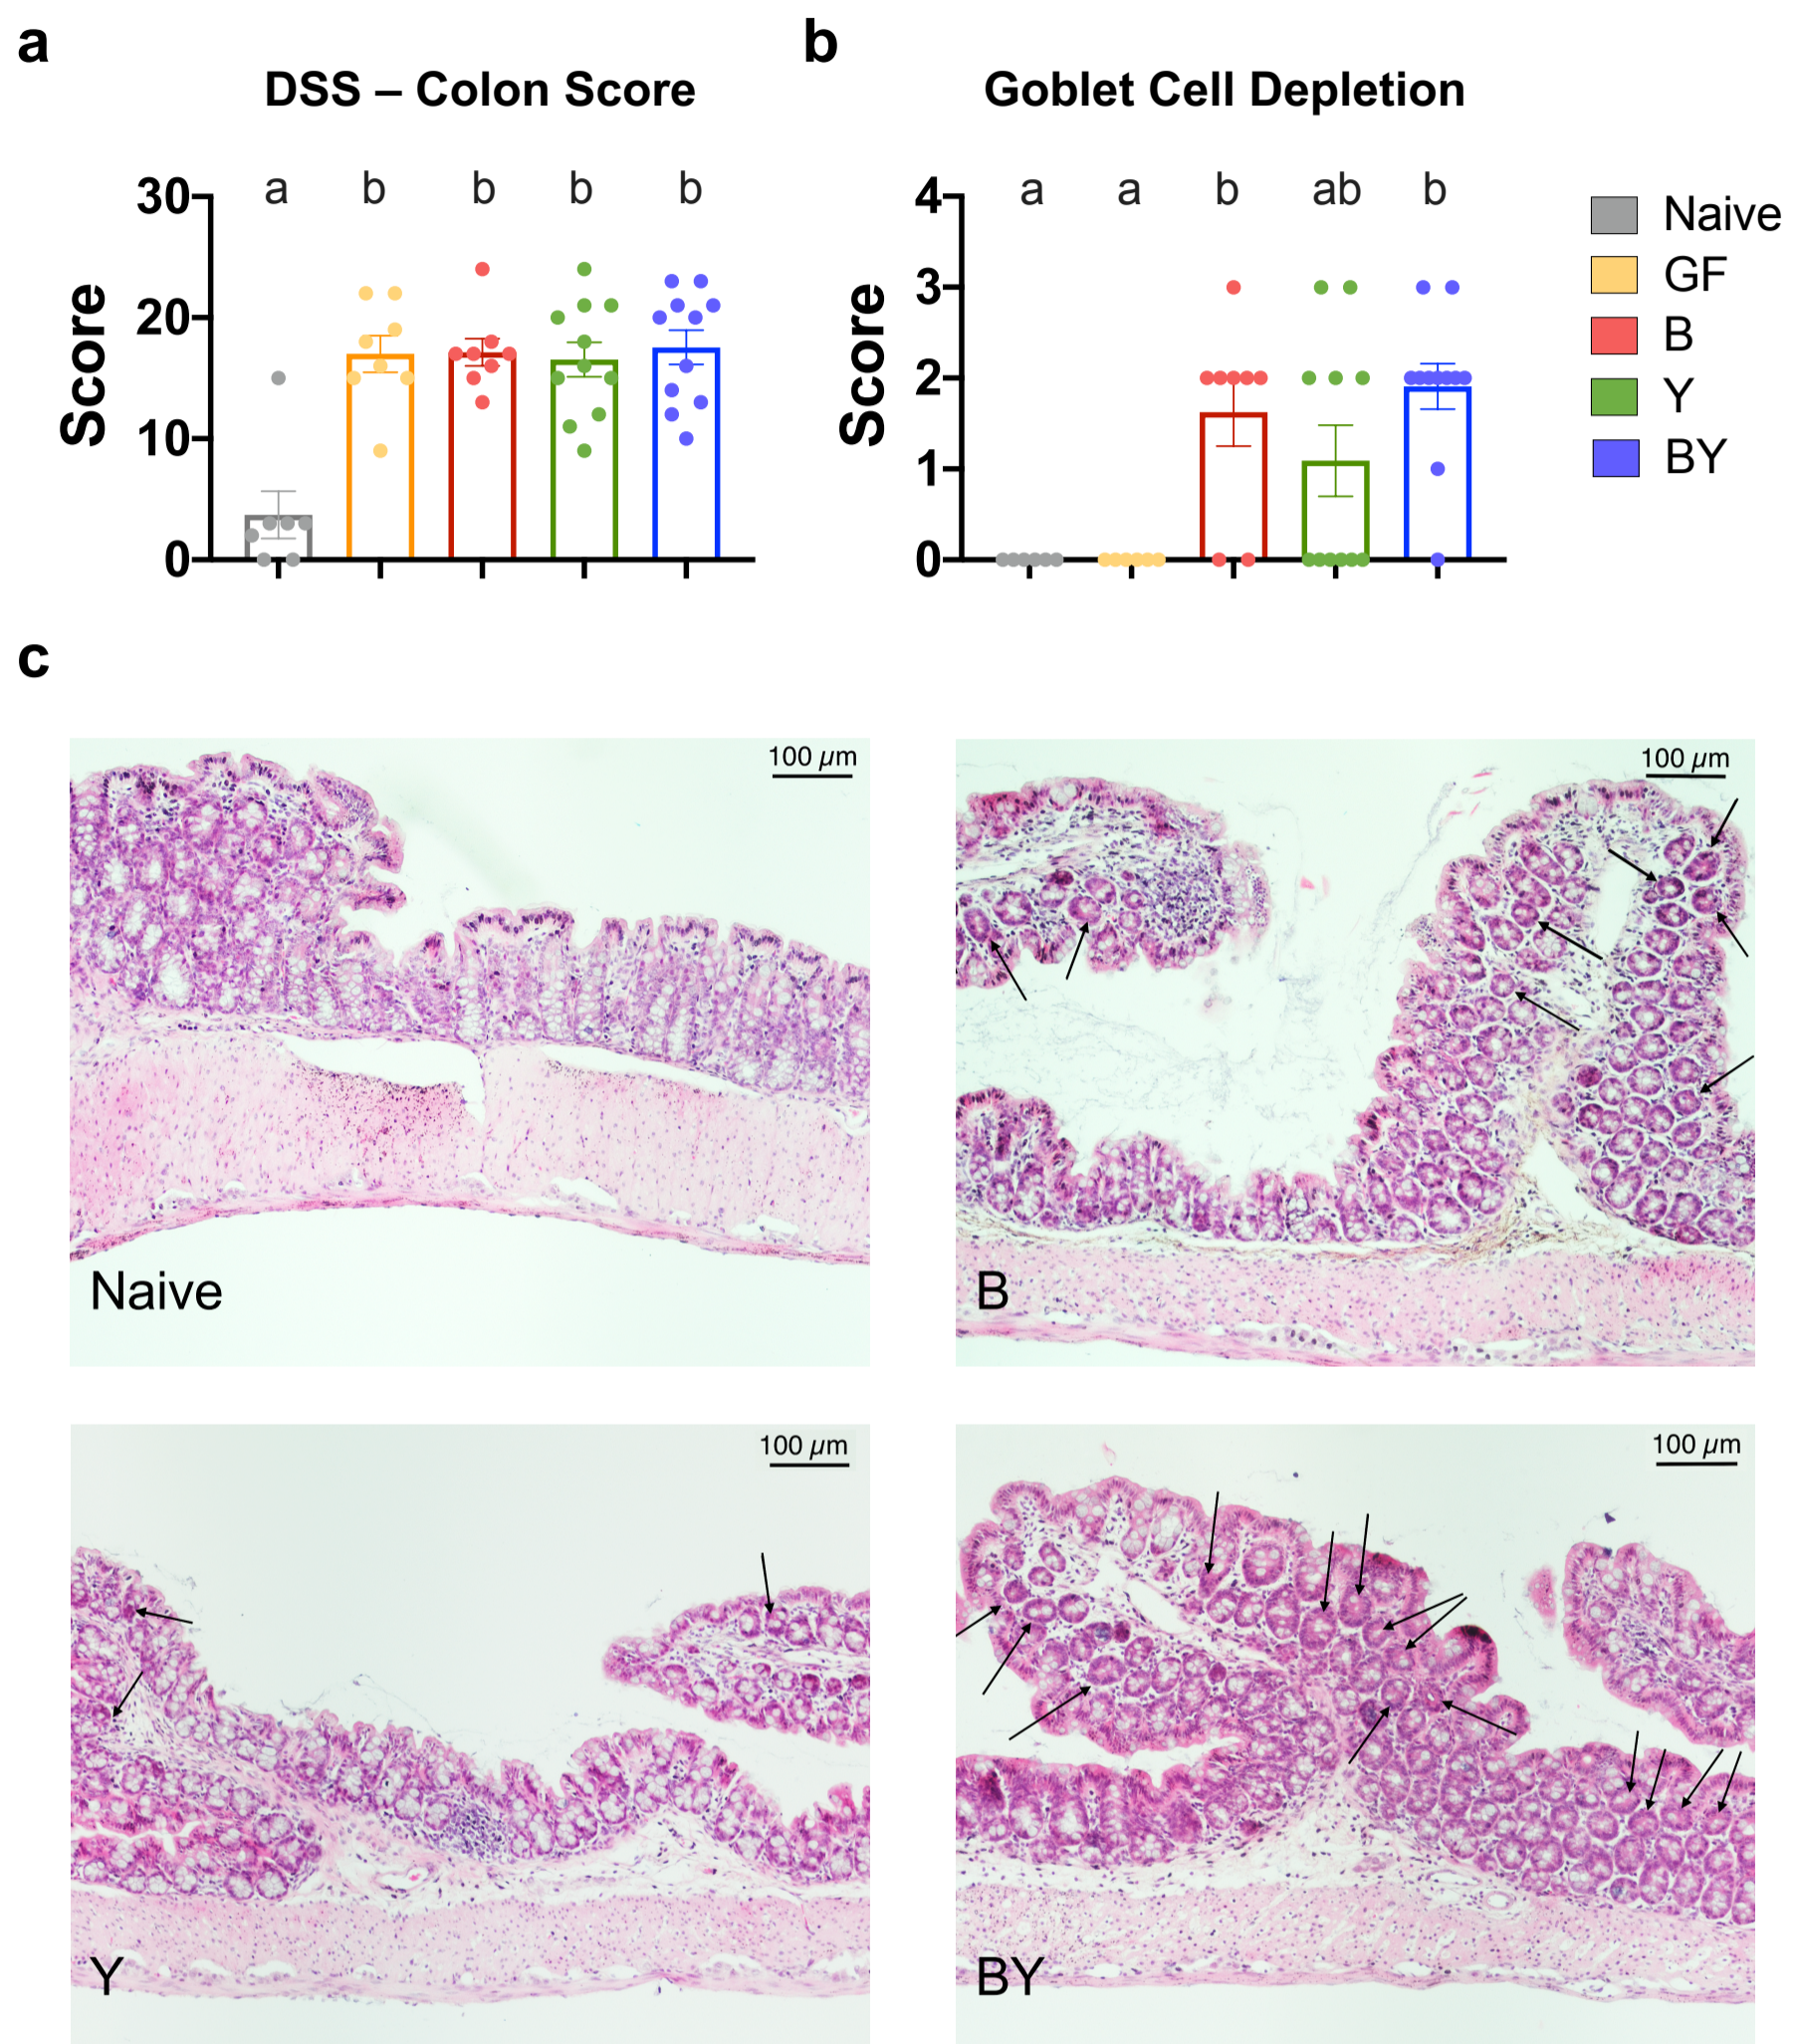

**Supplementary Fig. 2: DSS-induced colitis in gnotobiotic mice.** (a) Total histopathological inflammation score for DSS-challenged colon. Inflammation score was assessed by sum of pathological measurements, including total inflammation, crypt damage, crypt abscess and goblet cell depletion. (b) Results for goblet cell depletion. Presence (1) or absence (0) of goblet cell depletion was multiplied by degree score focal (1), patchy (2), or diffuse (3). (a-b) Data expressed as mean  $\pm$  S.E.M.; color denotes colonization and DSS treatment (Naive = gray, GF = yellow, B = red, Y = green, BY = royal blue);  $N_{\text{NAIVE}}=7$ ,  $N_{\text{GF}}=8$ ,  $N_{\text{B}}=8$ ,  $N_{\text{Y}}=11$ ,  $N_{\text{BY}}=11$ ; different letters above bars indicate statistically significant differences defined by one-way ANOVA and Tukey posthoc tests;  $P<0.05$ . (c) Representative hematoxylin and eosin (H&E)-stained sections from one gnotobiotic experiment. Arrows indicate regions of goblet cell depletion. Scale bar, 100  $\mu$ m. Source data are provided as a Source Data file.

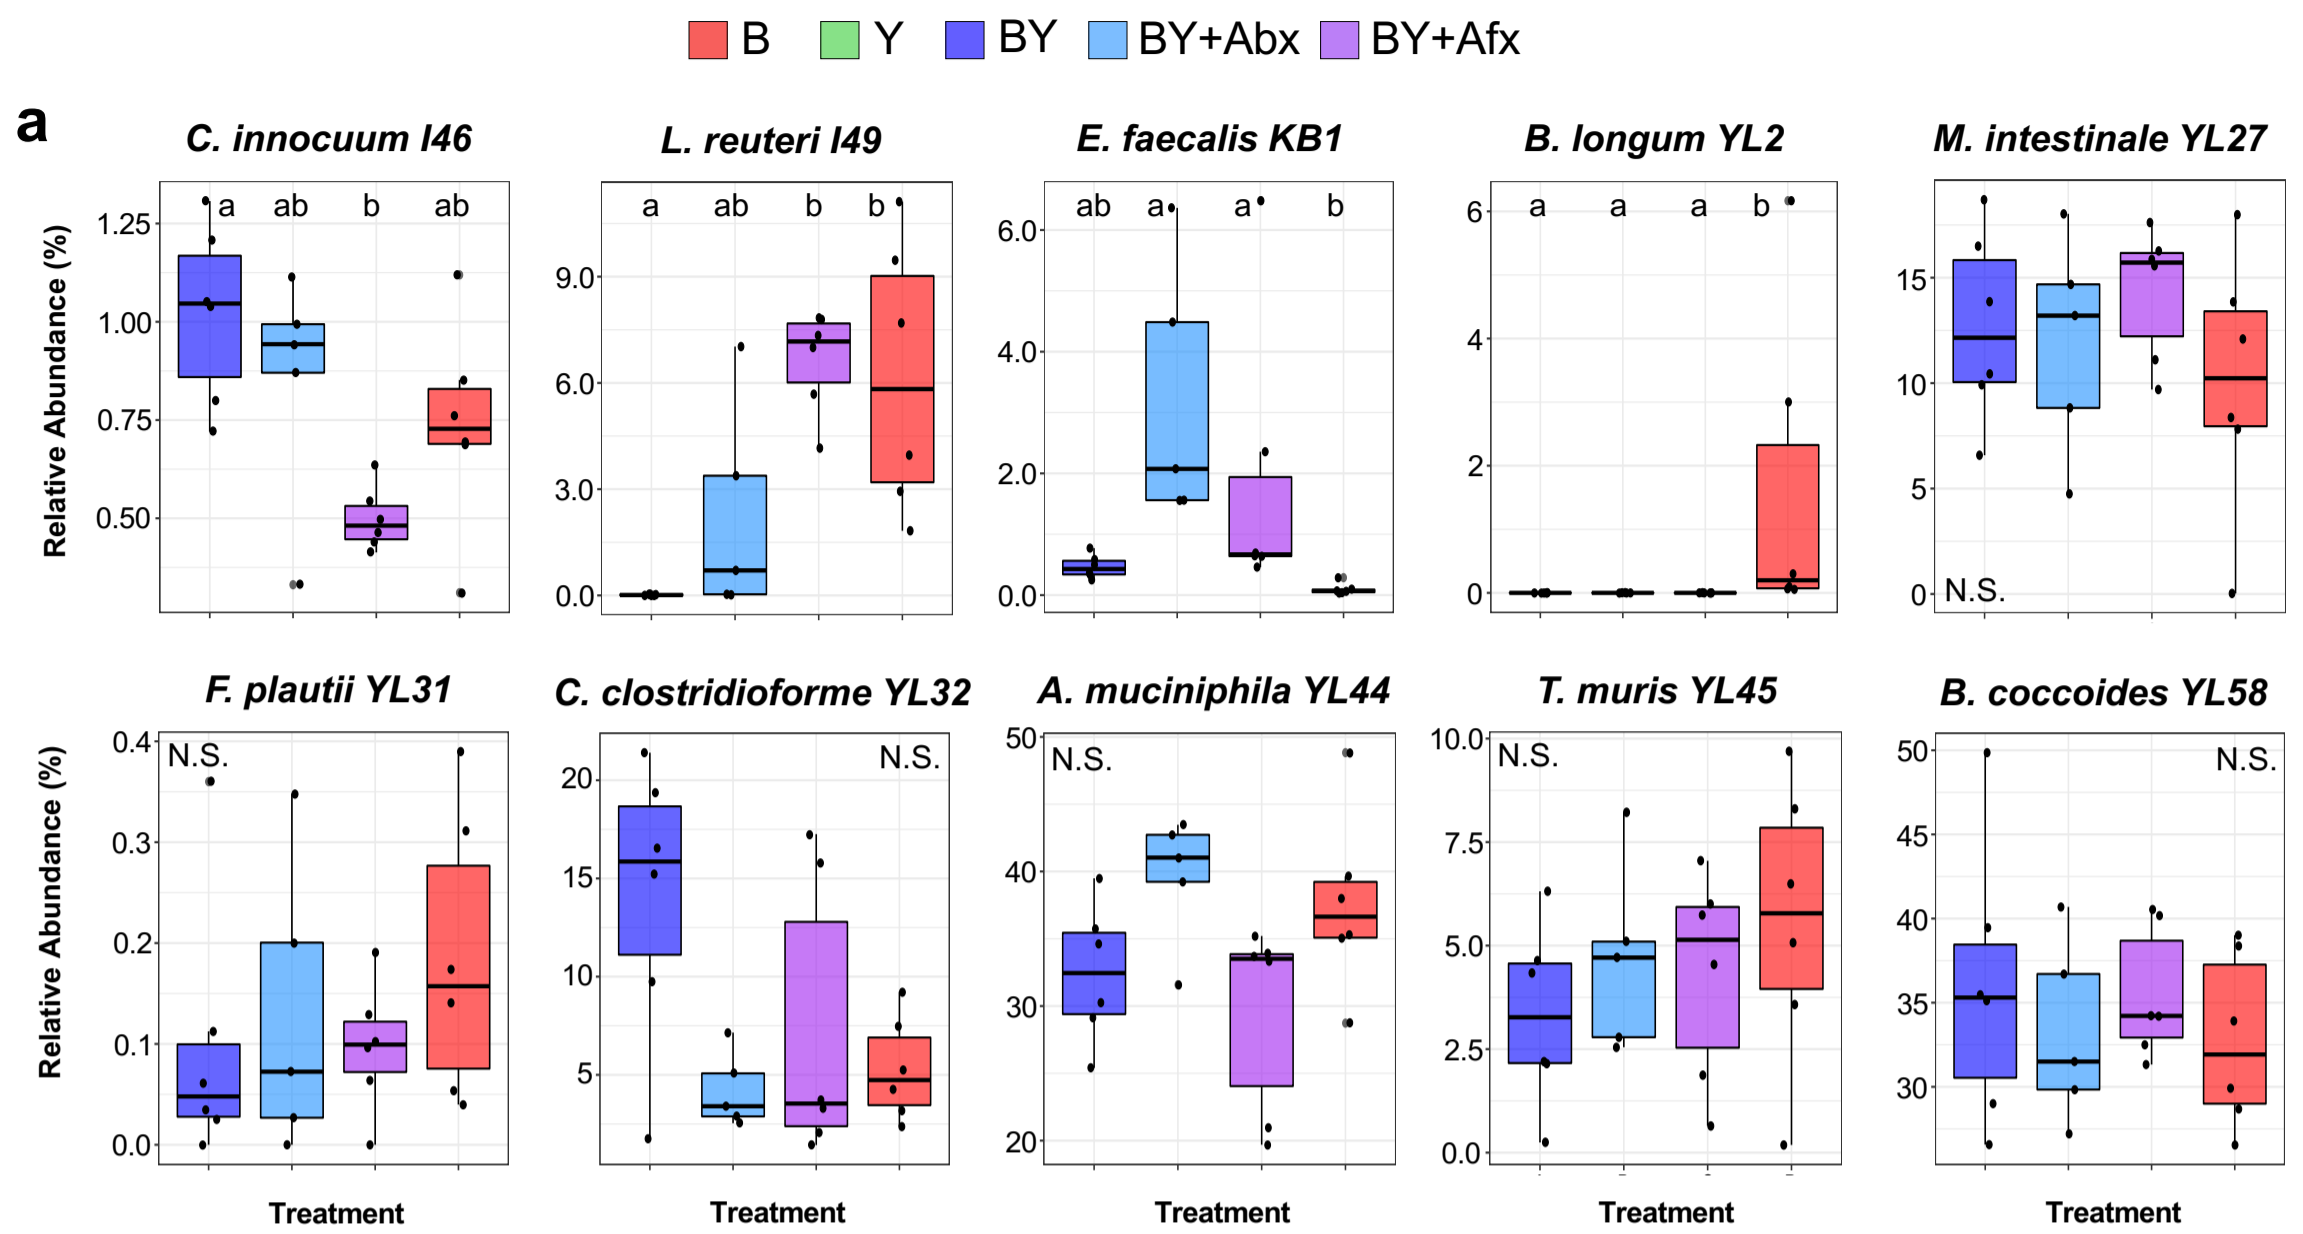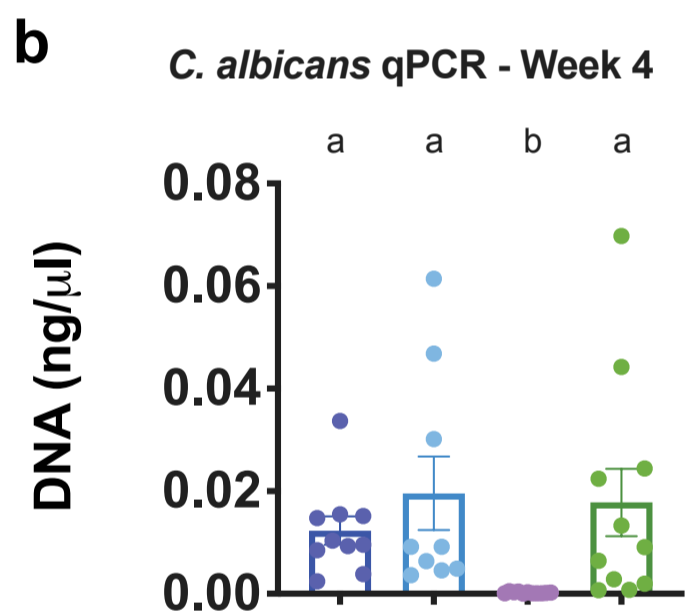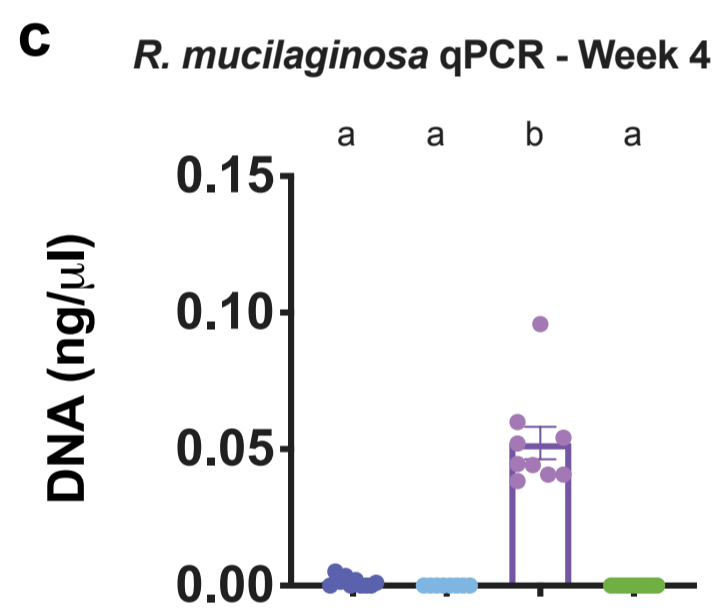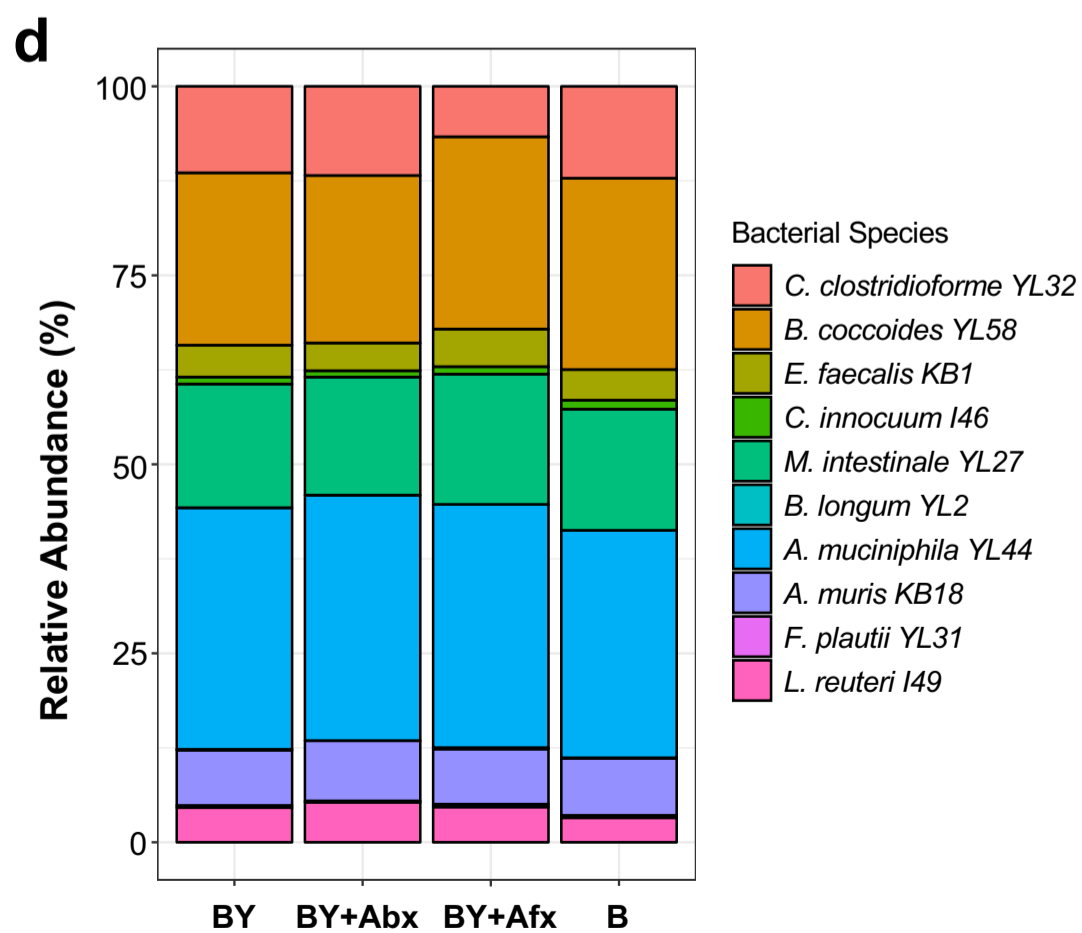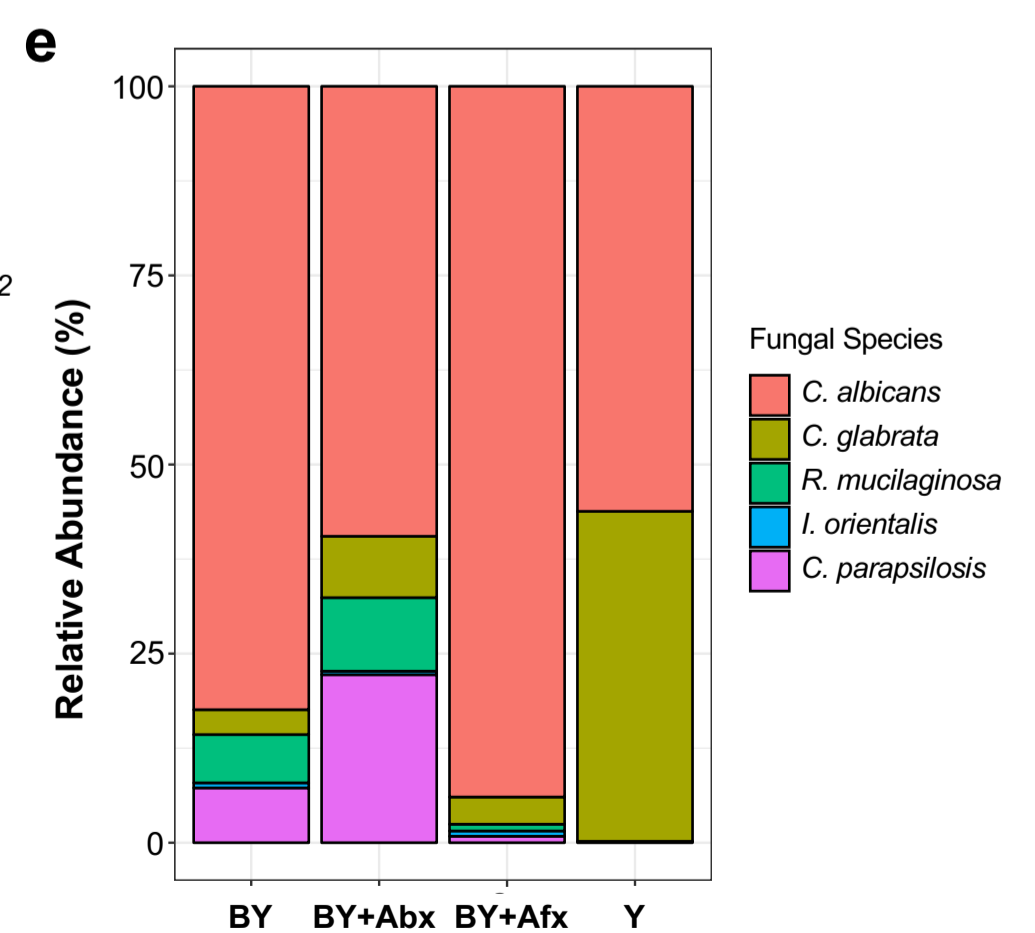

Supplementary Fig. 3

**Supplementary Fig. 3: Fungal colonization and antimicrobial treatments impact microbial community composition.** Ecological community analyses of 16S and ITS2 sequences. **(a)** Relative abundances of bacterial species at 4 weeks. qPCR quantification (standard curve method) of **(b)** *C. albicans* and **(c)** *R. mucilaginosa* DNA in fecal samples. Relative abundance plots of **(d)** bacterial and **(e)** fungal species at 9 weeks. (a-c) Color denotes colonization treatment (B = red, Y = green, BY = royal blue, BY+Abx = cyan blue, BY+Afx = purple); (d-e) Color denotes microbial species as indicated by graphs legend; (a) Boxplots indicate median (inside line) and 25% and 75% percentiles as the lower and upper hinges, respectively;  $N_B=6$ ,  $N_Y=8$ ,  $N_{BY}=6$ ,  $N_{Abx}=5$ ,  $N_{Afx}=6$ ; (b-c) data combined from two different experiments and expressed as mean  $\pm$  S.E.M.;  $N_Y=14$ ,  $N_{BY}=12$ ,  $N_{Abx}=10$ ,  $N_{Afx}=12$ ; (d-e) Coloured boxes in abundance plots denote median percentage abundance per taxa;  $N_B=10$ ,  $N_Y=11$ ,  $N_{BY}=10$ ,  $N_{Abx}=7$ ,  $N_{Afx}=12$ . Different letters above bars indicate statistically significant differences defined by (a, d) Kruskal-Wallis with post-hoc Dunn tests and FDR corrected or (b-c) one-way ANOVA and Tukey posthoc tests;  $P<0.05$ ; N.S. no significant differences. Source data are provided as a Source Data file.

**a**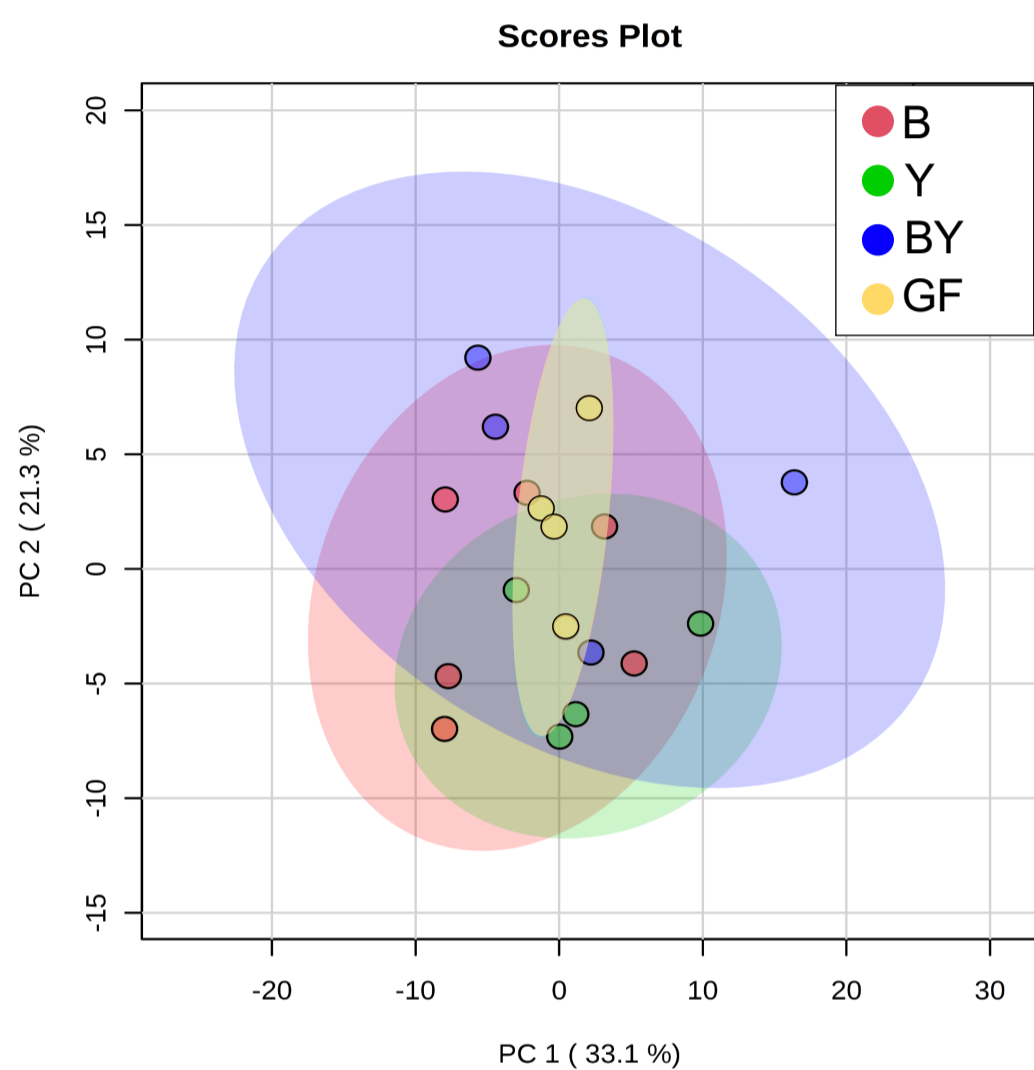**b**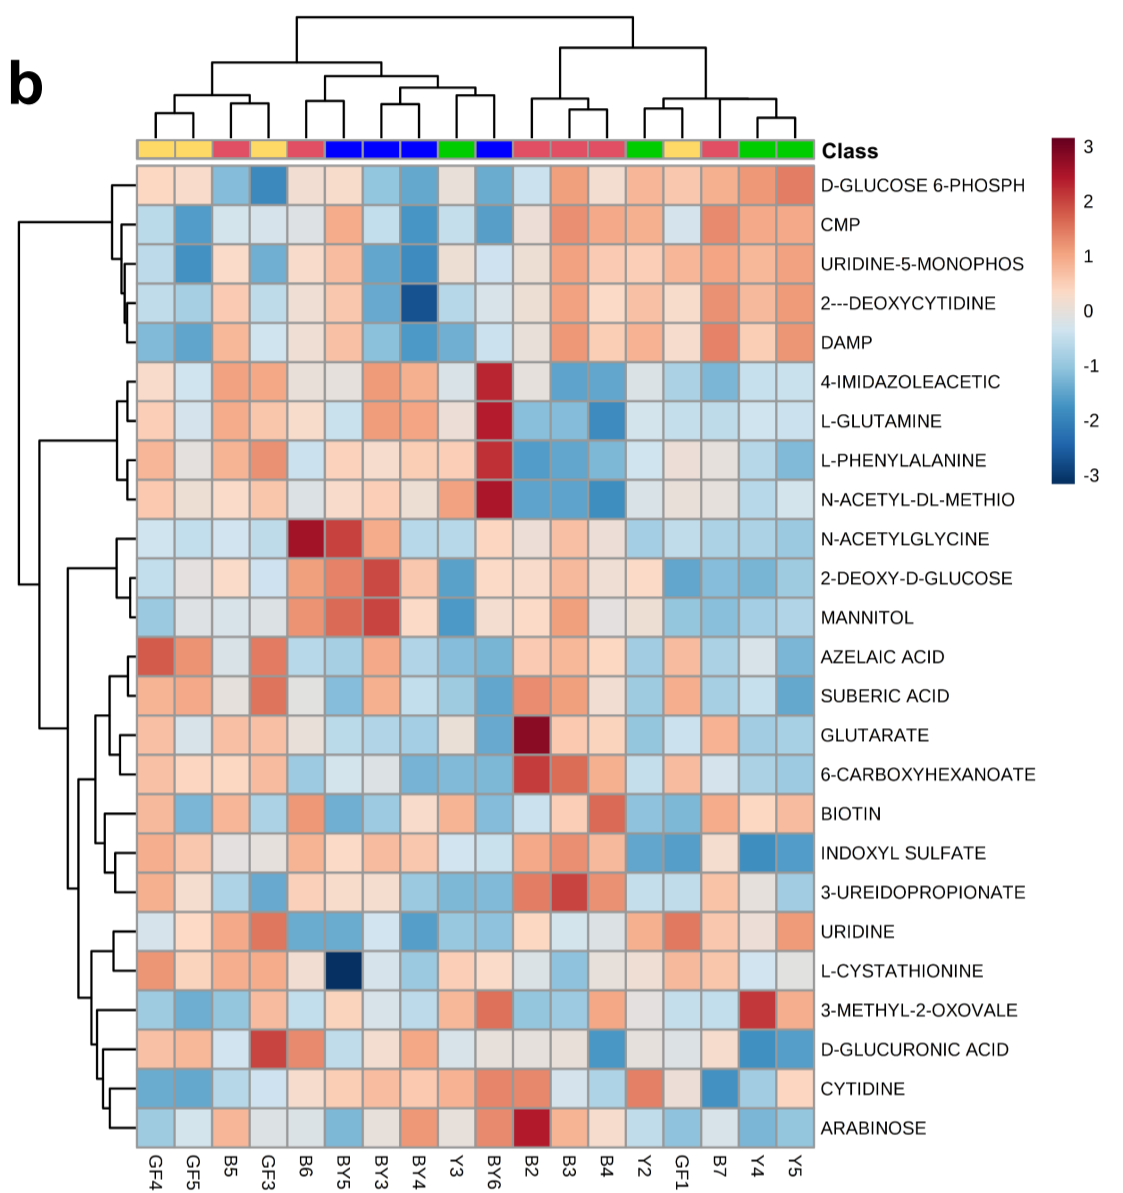

**Supplementary Fig. 4: Metabolic profiles of small intestine content is not different among gnotobiotic groups.** (a) Principal component analysis score plot of 124 metabolites detected in small bowel fecal content of gnotobiotic mice groups at 4 weeks of age. (b) Heat map of expression of top 25 metabolites detected in small bowel contents at 4 weeks. (a-b) Color denotes colonization treatment (GF = yellow, B = red, Y = green, BY = royal blue);  $N_{GF}=4$ ,  $N_B=6$ ,  $N_Y=4$ ,  $N_{BY}=4$ ; no statistically significant differences between groups (one-way ANOVA with Fisher's post-hoc FDR correction). Source data are provided as a Source Data file.

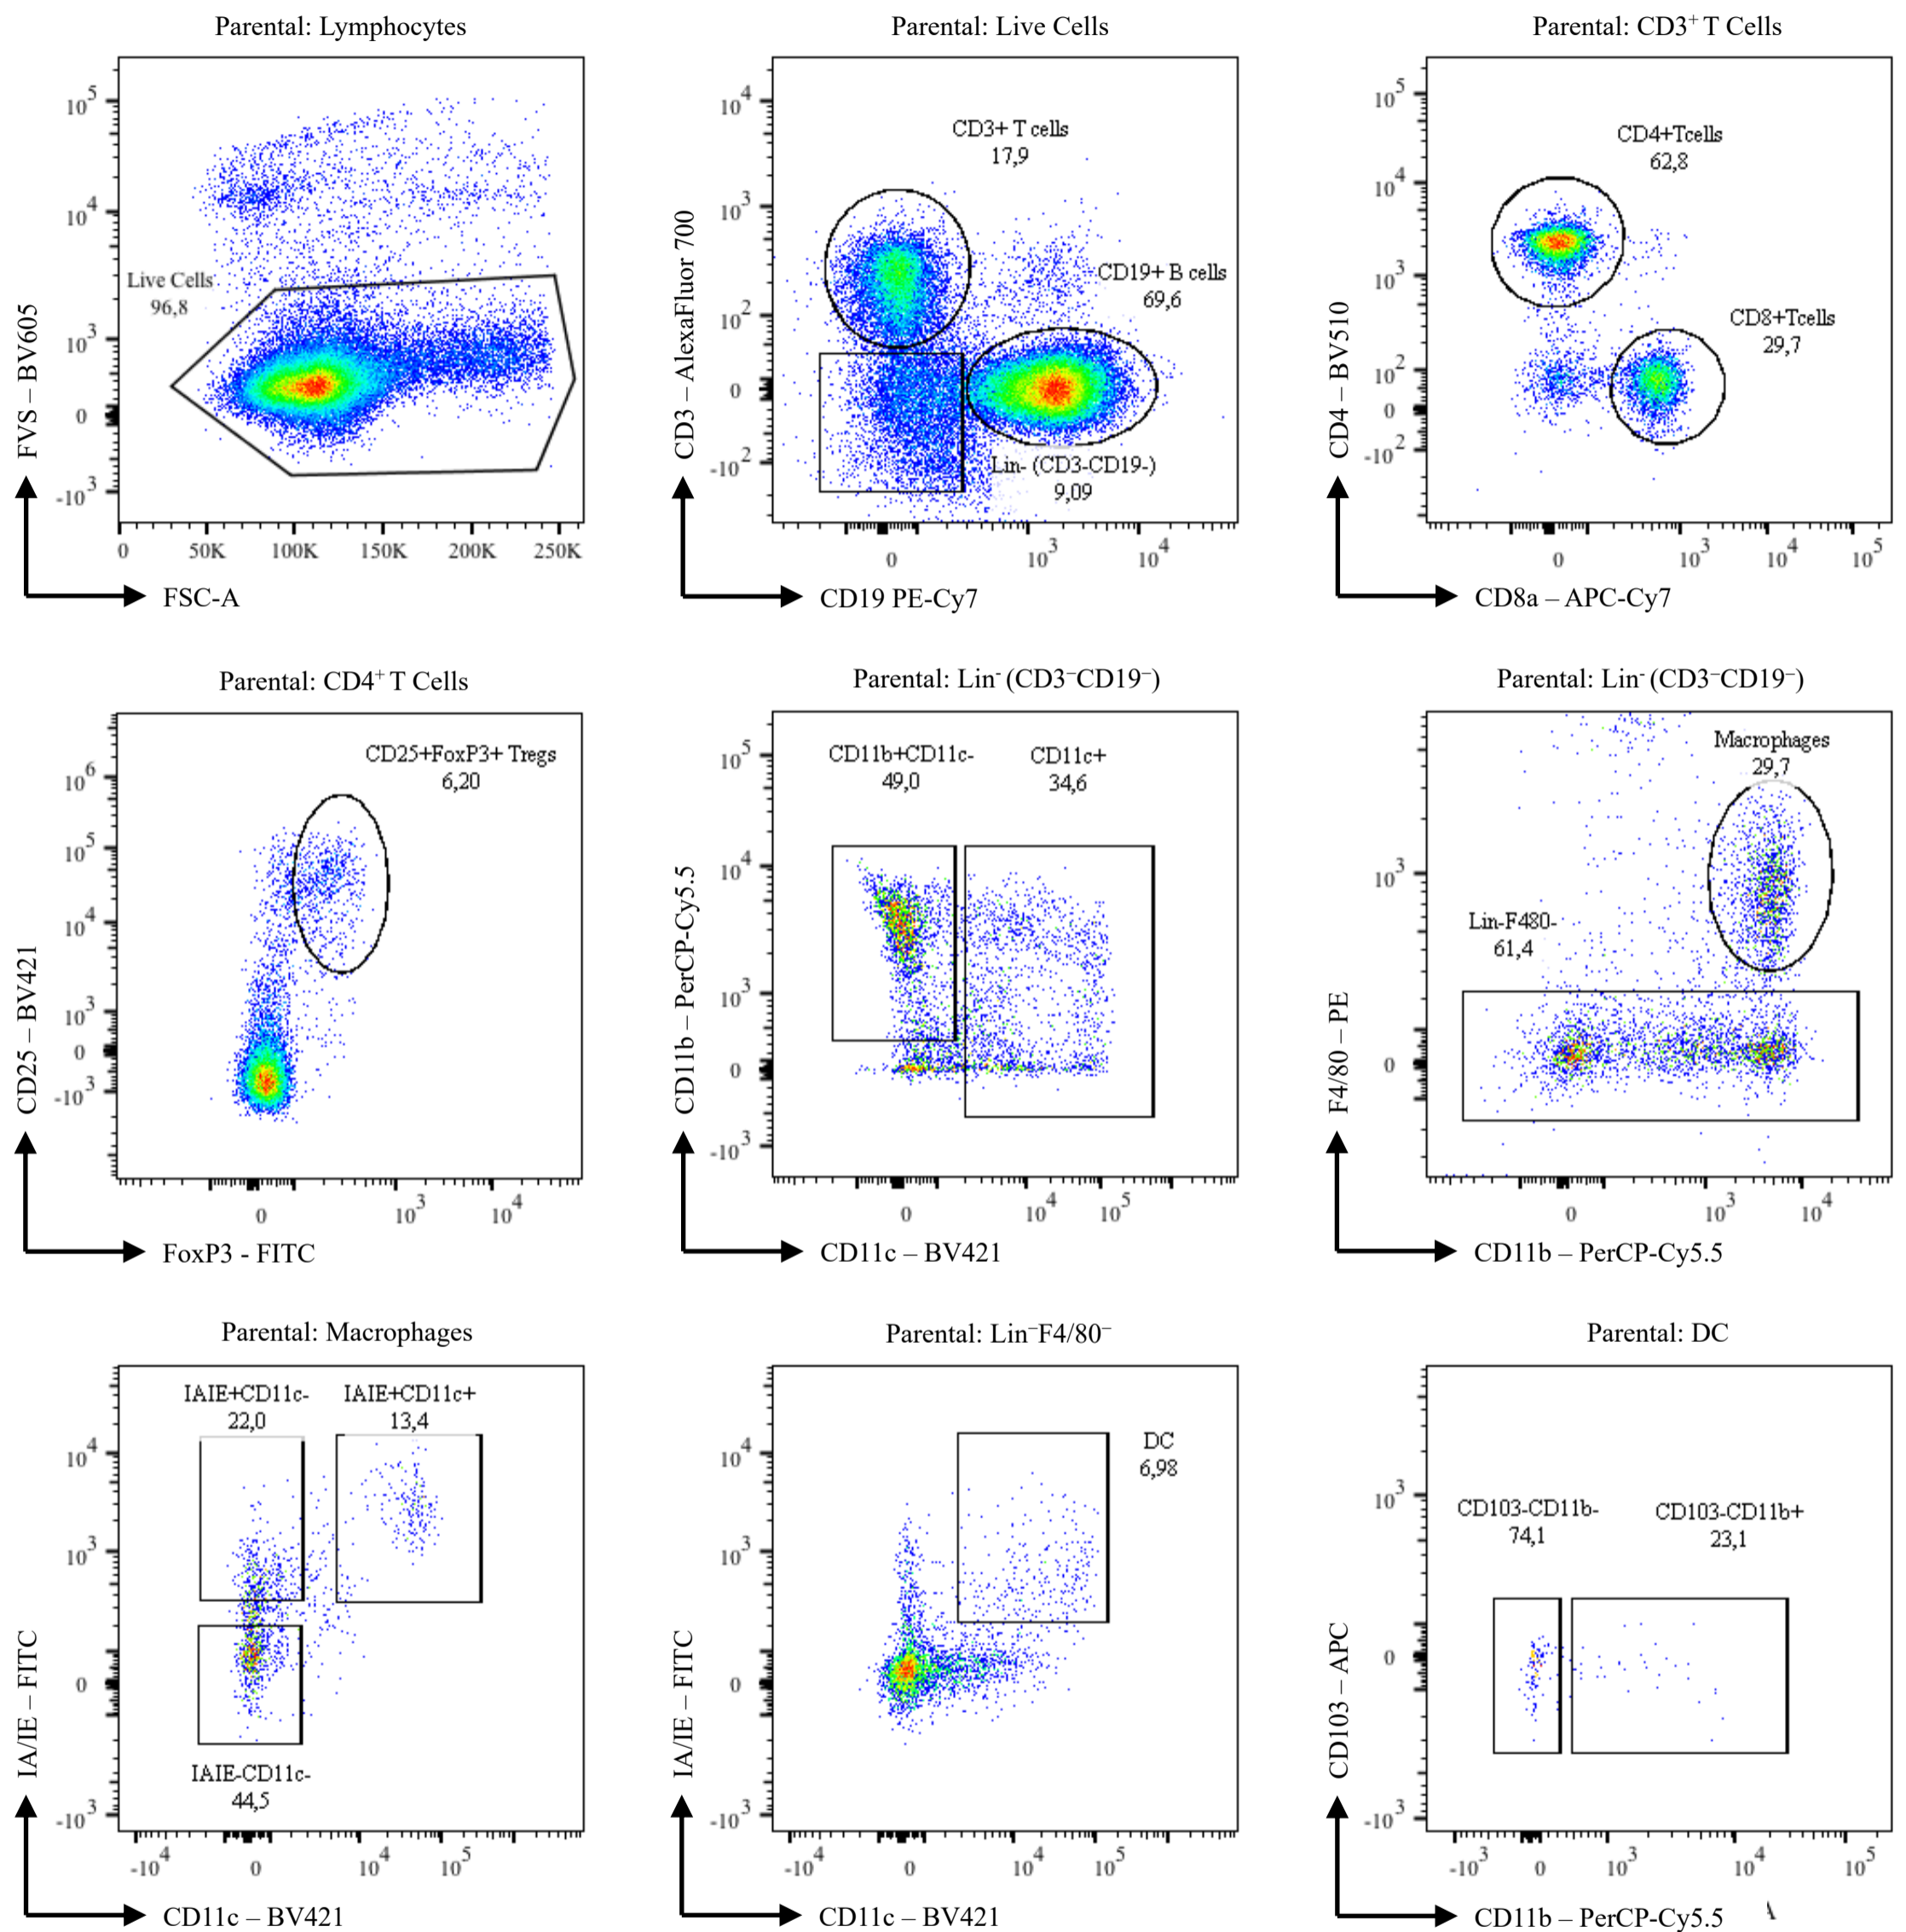

**Supplementary Fig. 5: Flow cytometry gating strategy.** Spleen immune cells were stained with intra- and extracellular marker-specific antibodies and sorted by flow cytometry (see methods). Analysis performed in FlowJo™ version 10.5.3.

GF B Y BY BY+Abx BY+Afx

### a Spleen Cell Populations

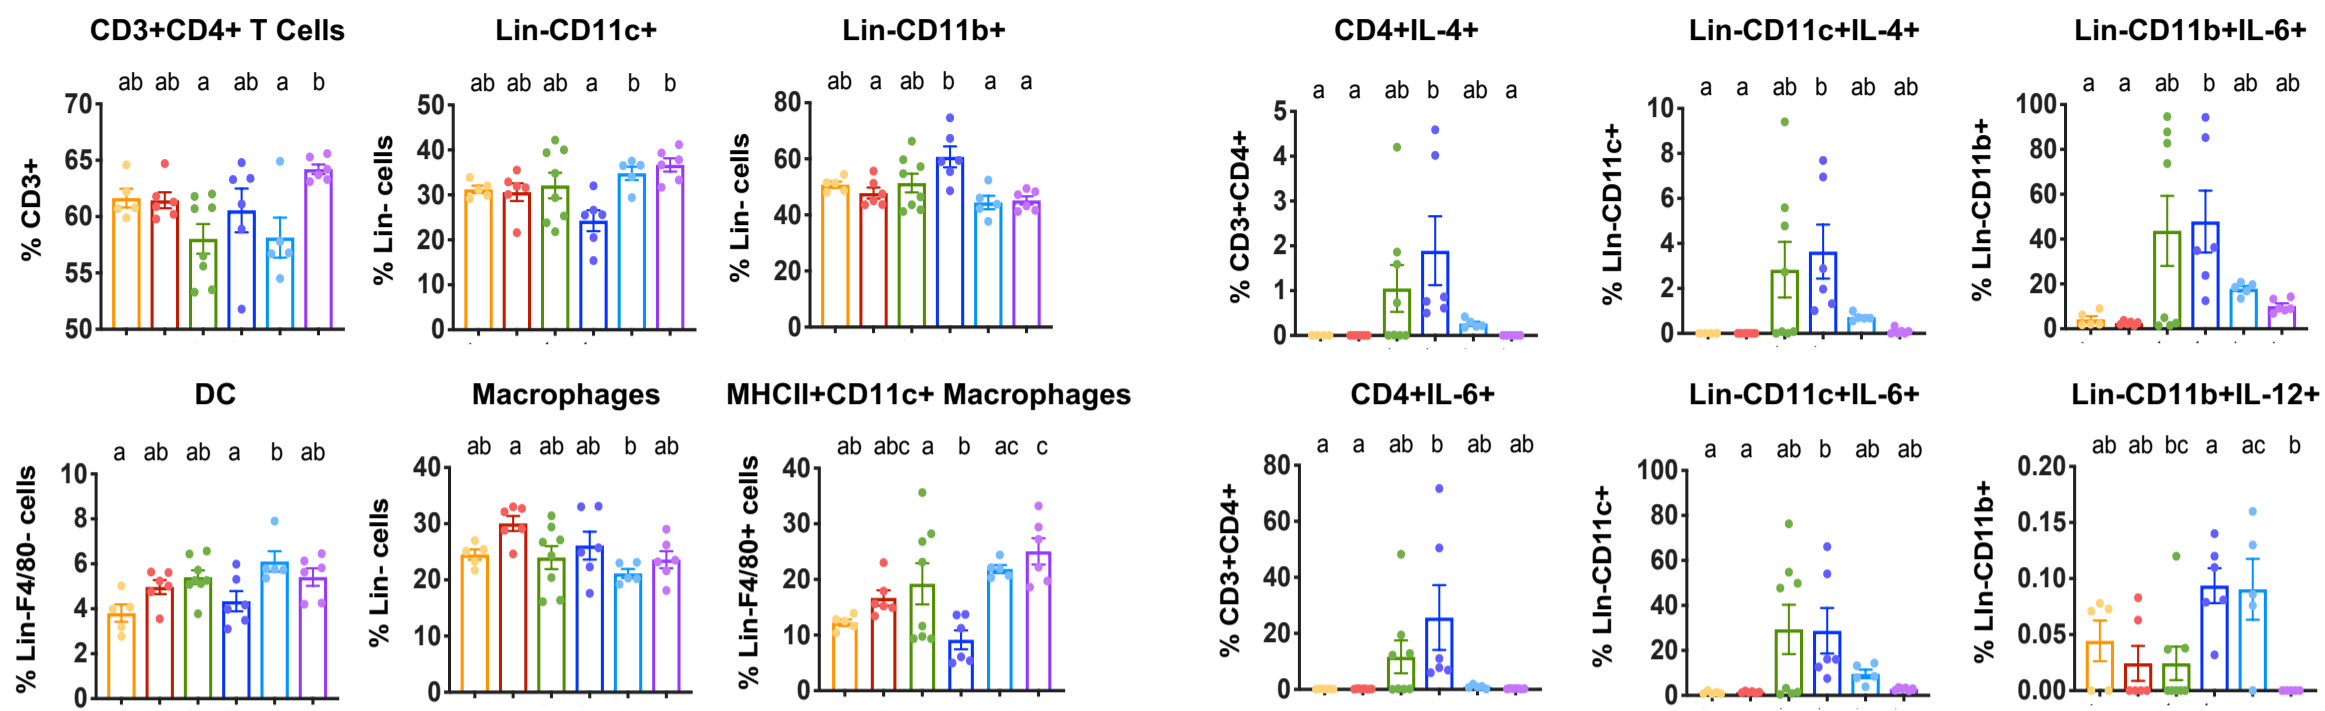

### b Spleen Cytokines

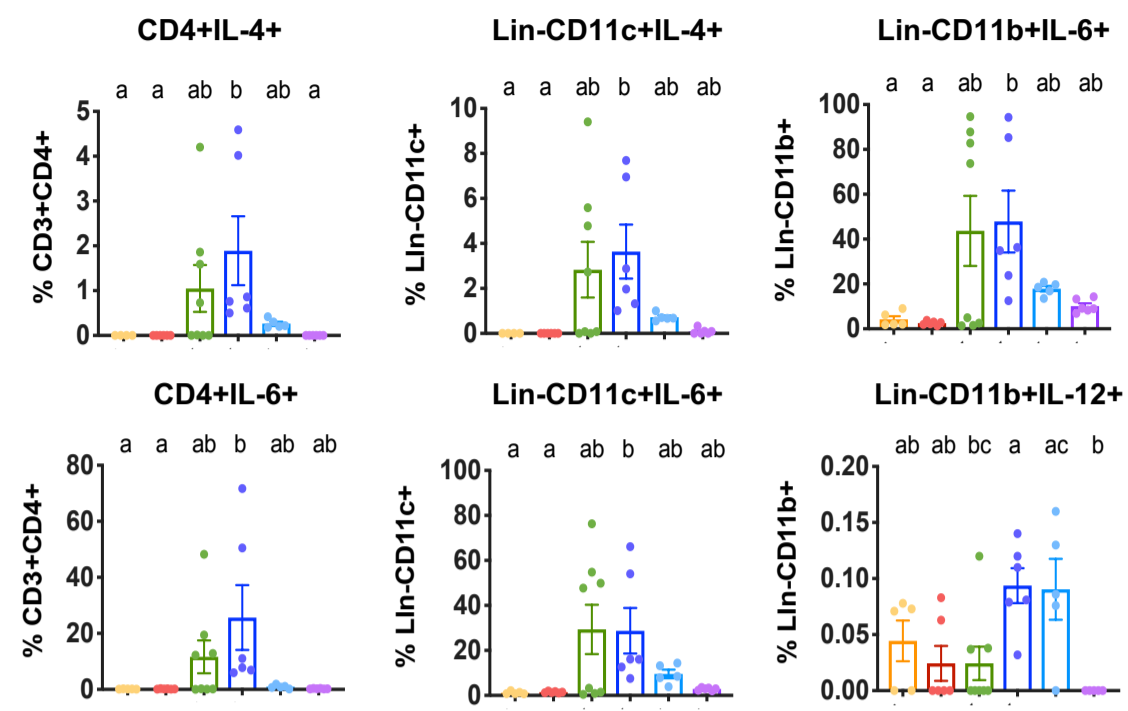

### c Serum Antibodies

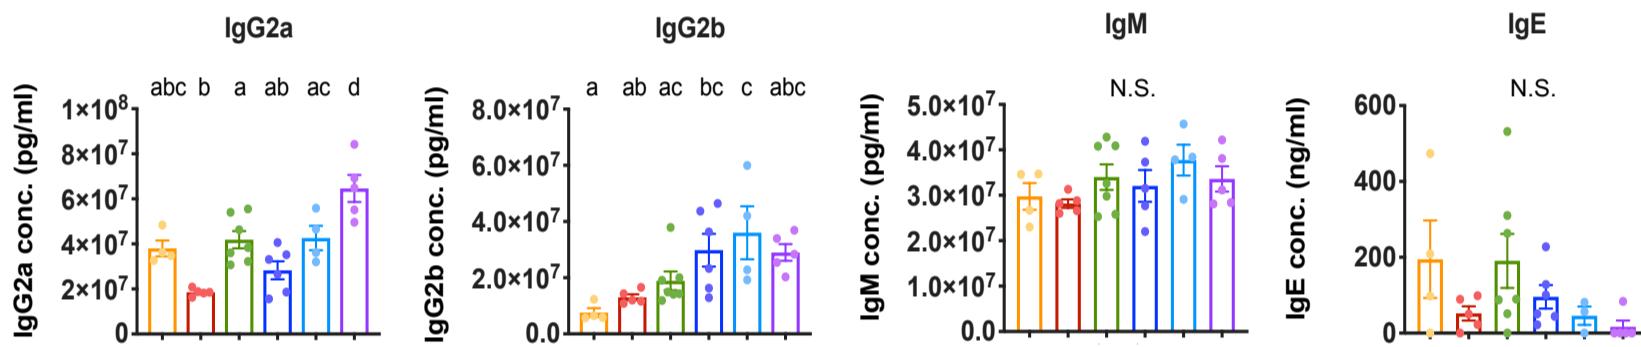

### d Jejunum Cytokines

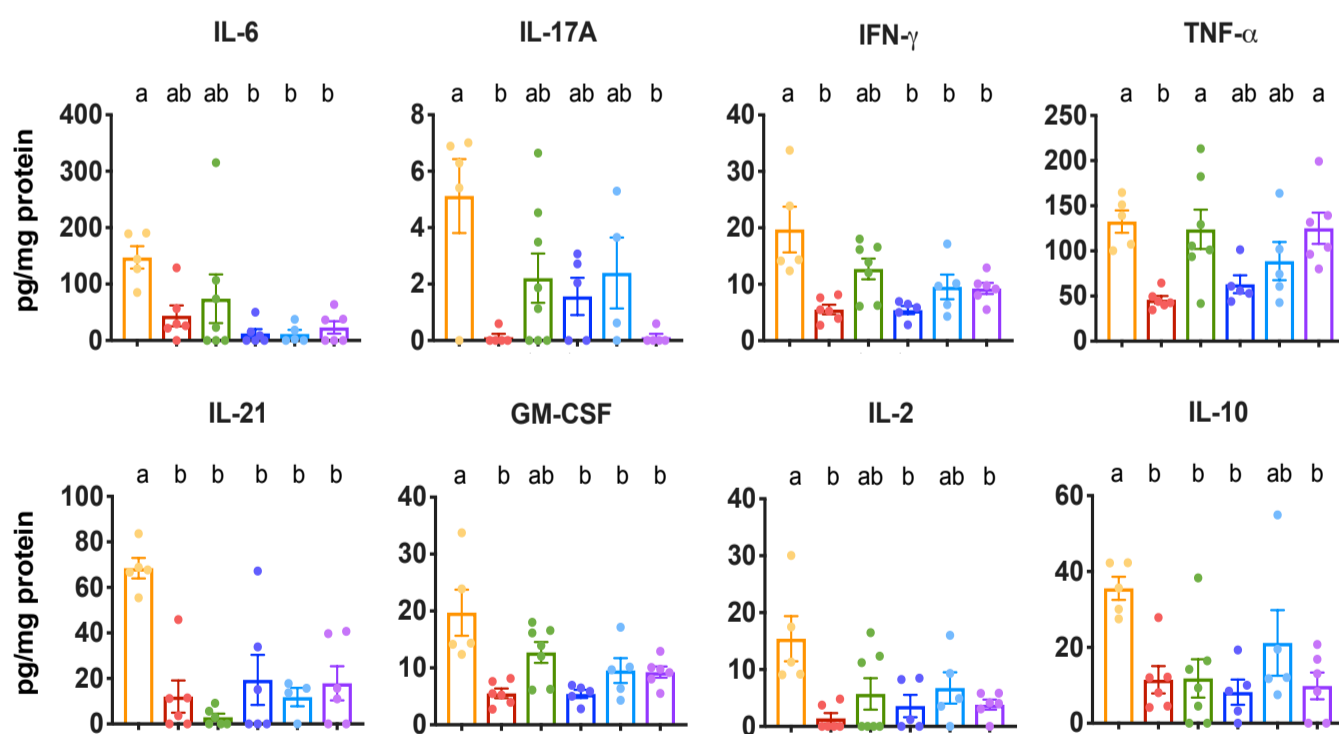

### e Colon Cytokines

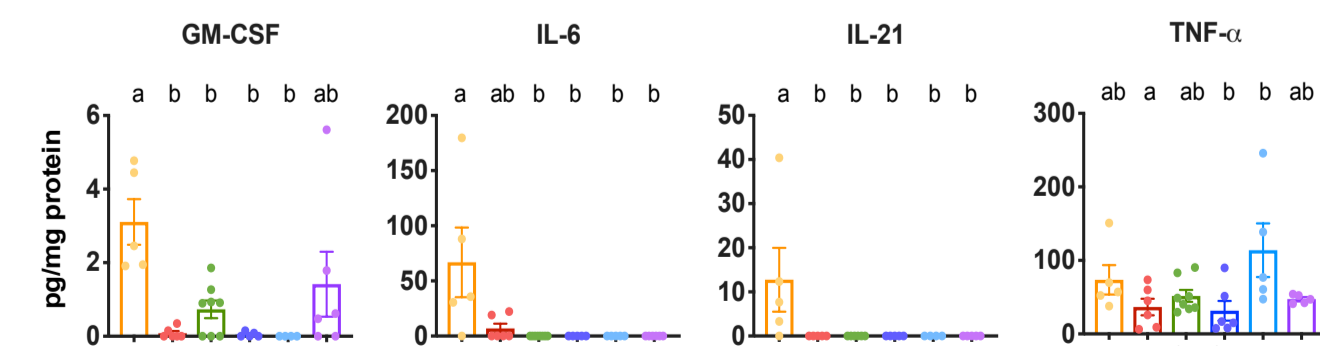

**Supplementary Fig. 6: Fungal colonization impacts systemic and intestinal immunity.** Percentage of (a) spleen cell populations and (b) cytokine-producing splenocytes from 4-week-old gnotobiotic mice. (c) Serum antibody concentrations detected by electrochemiluminescence (MSD – IgG2a, IgG2b and IgM) or ELISA (IgE). Cytokine concentration in (d) jejunum and (e) colon lysates detected by electrochemiluminescence (MSD). (a-e) Data expressed as mean  $\pm$  S.E.M.; color denotes colonization treatment (GF = yellow, B = red, Y = green, BY = royal blue, BY+Abx = cyan blue, BY+Afx = purple);  $N_{GF}=5$ ,  $N_B=6$ ,  $N_Y=8$ ,  $N_{BY}=6$ ,  $N_{Abx}=5$ ,  $N_{Afx}=6$ ; different letters above bars indicate statistically significant differences defined by one-way ANOVA and Tukey posthoc tests;  $P<0.05$ . Source data are provided as a Source Data file.



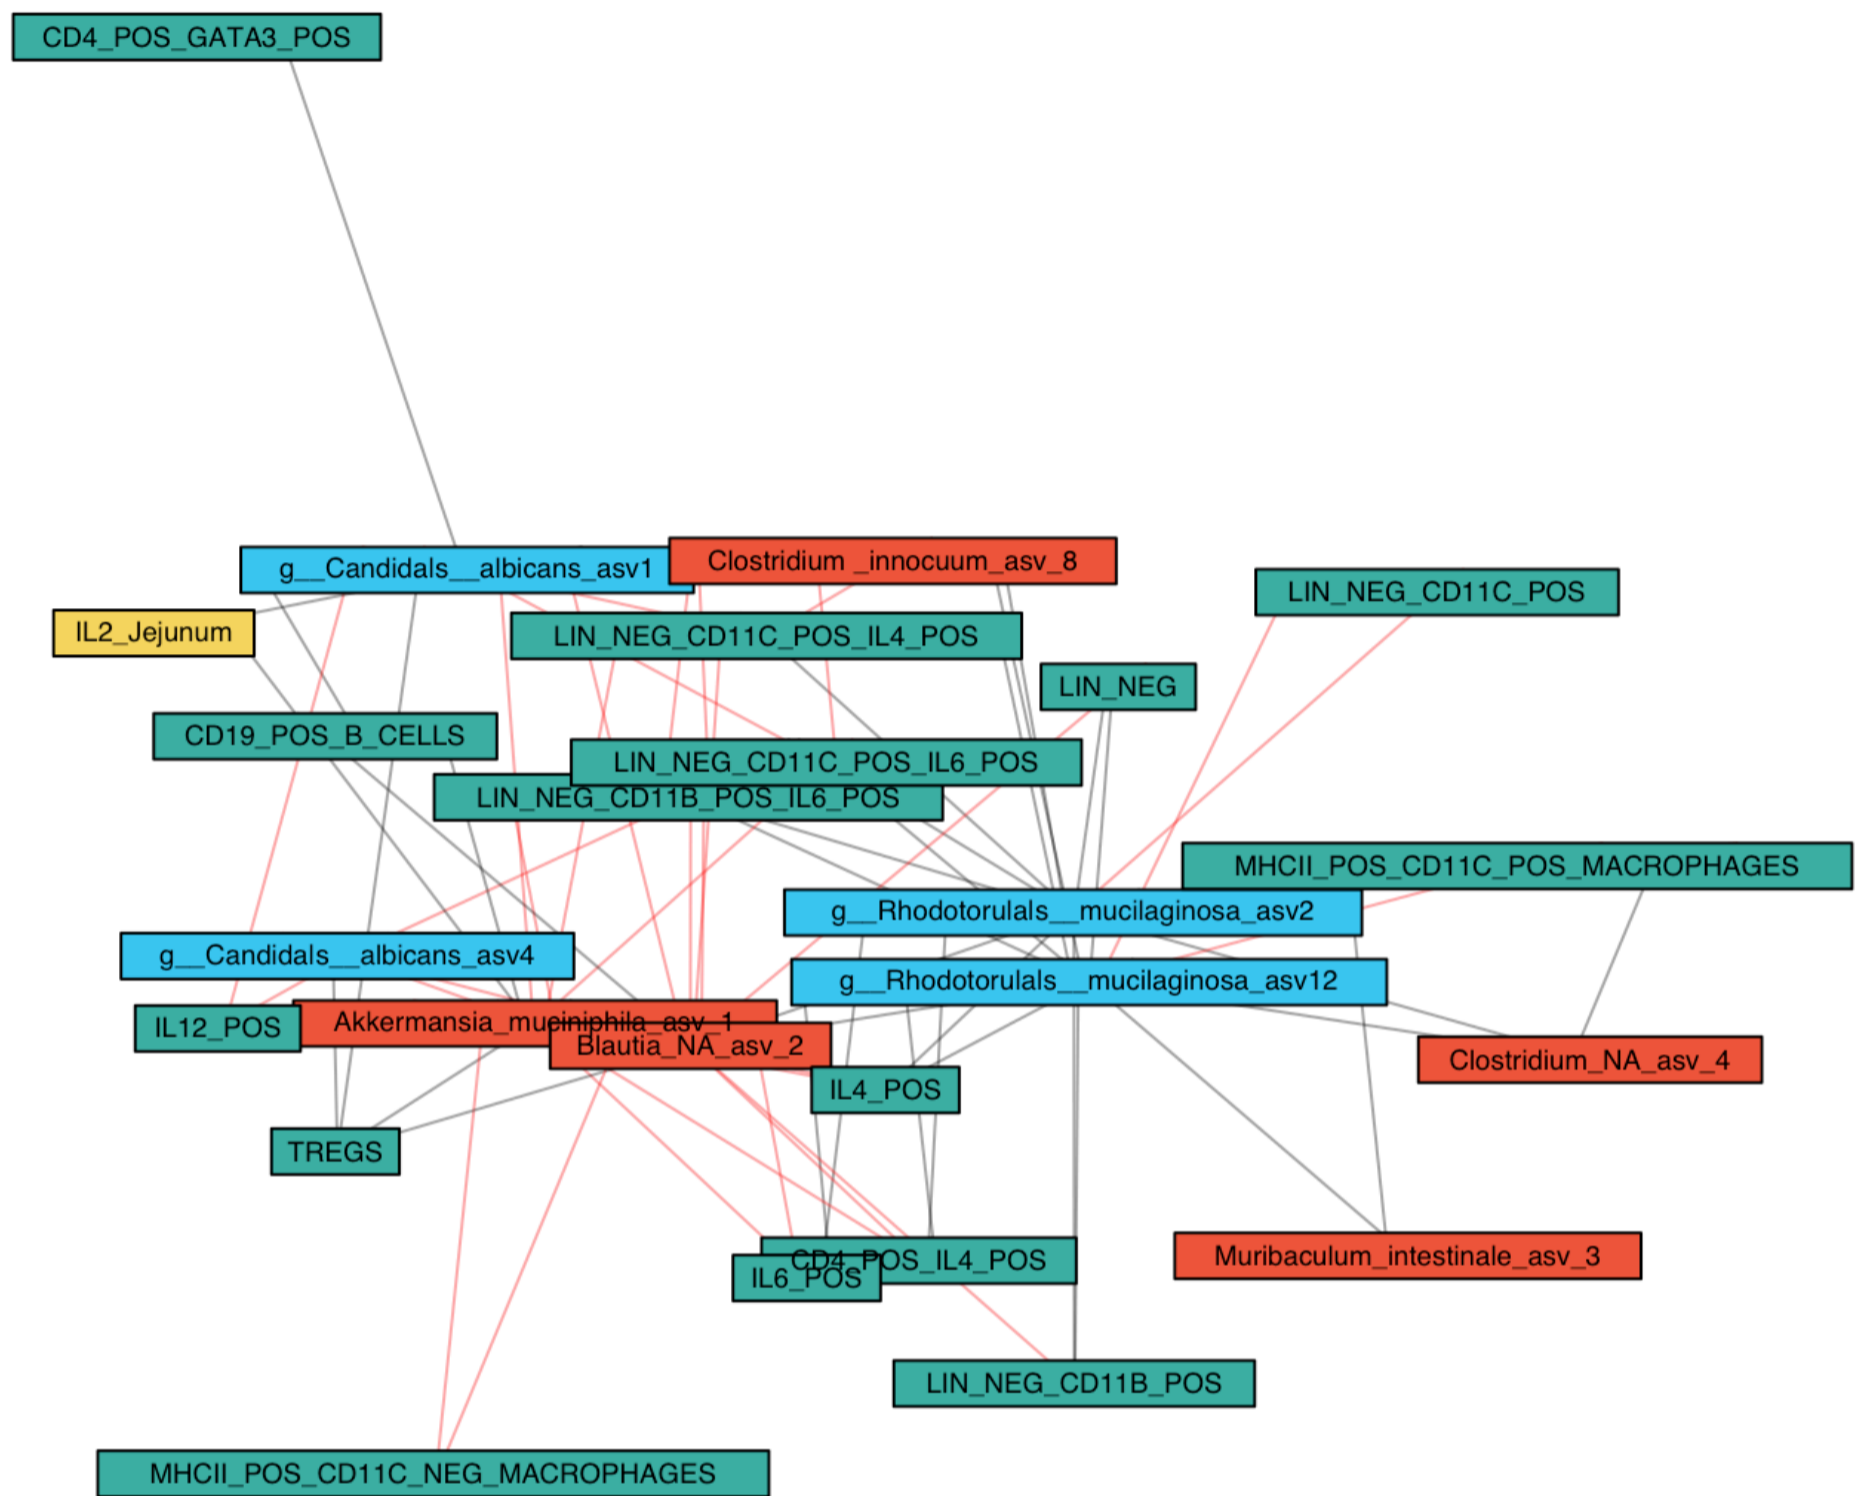

**Supplementary Fig. 7: Network plot for microbial ASVs and immune features.** Relevance network plots for bacteria (Persian red) and fungi (blue) ASVs with the systemic (green) and intestinal (yellow) immune features. Relevant correlations are denoted with a line (red=positive, black=negative) and defined by pair-wise similarity matrix for SGCCA.

**Supplementary Table 1:** Microbial species and primers used in this study.

| <b>Oligo-MM<sub>12</sub> Consortium 1</b>                  |                               | <b>Source</b>       |
|------------------------------------------------------------|-------------------------------|---------------------|
| <i>'Acutalibacter muris'</i> – KB18                        |                               | Dr. K.D. McCoy      |
| <i>Akkermansia muciniphila</i> – YL44                      |                               | Dr. K.D. McCoy      |
| <i>'Bacteroides caecimuris'</i> – I48                      |                               | Dr. K.D. McCoy      |
| <i>Bifidobacterium longum</i> subsp. <i>animalis</i> – YL2 |                               | Dr. K.D. McCoy      |
| <i>Blautia coccooides</i> – YL58                           |                               | Dr. K.D. McCoy      |
| <i>Clostridium clostridioforme</i> – YL32                  |                               | Dr. K.D. McCoy      |
| <i>Clostridium innocuum</i> – I46                          |                               | Dr. K.D. McCoy      |
| <i>Enterococcus faecalis</i> – KB1                         |                               | Dr. K.D. McCoy      |
| <i>Flavonifractor plautii</i> – YL31                       |                               | Dr. K.D. McCoy      |
| <i>Lactobacillus reuteri</i> – I49                         |                               | Dr. K.D. McCoy      |
| <i>Muribaculum intestinale</i> – YL27                      |                               | Dr. K.D. McCoy      |
| <i>'Turicimonas muris'</i> – YL45                          |                               | Dr. K.D. McCoy      |
| <b>Fungal Strains</b>                                      | <b>Fungal Guild 2</b>         |                     |
| <i>Candida albicans</i>                                    | Undefined Saprotroph          | Dr. D.R. Pillai/APL |
| <i>Candida glabrata</i>                                    | Undefined Saprotroph          | Dr. D.R. Pillai/APL |
| <i>Candida parapsilosis</i>                                | Undefined Saprotroph          | Dr. D.R. Pillai/APL |
| <i>Issatchenkia orientalis</i>                             | Undefined Saprotroph          | DSMZ (DSM 28721)    |
|                                                            | Animal Endosymbiont-Animal    |                     |
| <i>Rhodotorula mucilaginosa</i>                            | Pathogen-Endophyte-Plant      | DSMZ (DSM 70825)    |
|                                                            | Pathogen-Undefined Saprotroph |                     |
| <b>Universal 16S Primers 3</b>                             |                               |                     |
| U16Sfr: 5'-TCC TAC GGG AGG CAG CAG T-3'                    |                               |                     |
| U16Srv: 5'- GGA CTA CCA GGG TAT CTA ATC CTG TT-3'          |                               |                     |
| <b>Fungal 18S Primers 4</b>                                |                               |                     |
| FR1: 5'-AIC CAT TCA ATC GGT AIT-3'                         |                               |                     |
| FF390: 5'-CGA TAA CGA ACG AGA CCT-3'                       |                               |                     |
| <b><i>C. albicans</i>-Specific Primers 5</b>               |                               |                     |
| CALB1: 5'-TTT ATC AAC TTG TCA CAC CAG A-3'                 |                               |                     |
| CALB2: 5'-ATC CCG CCT TAC CAC TAC CG-3'                    |                               |                     |
| <b><i>R. mucilaginosa</i>-Specific Primers 6</b>           |                               |                     |
| RM-5fw: 5'-GCG CTT TGT GAT ACA TTT TC-3'                   |                               |                     |
| RM-3bw: 5'-CCA TTA TCC ATC CCG GAA AA-3'                   |                               |                     |

**Abbreviations:**

APL = Alberta Public Laboratories; DSMZ = Leibniz Institute DSMZ-German Collection of Microorganisms and Cell Cultures GmbH.

**Supplementary Table 2: Permutational multivariate analysis of mice gut bacterial (16S) taxonomic community structure.** Permutational multivariate analysis of variance stabilizing transformed community matrix testing the influence of cage ID, treatment type, and collection week. P-values of statistical significance defined by PERMANOVA on Bray-Curtis distances.

| <b>Whole Dataset</b>   |           | <b>16S Permutation</b> |                          |                |
|------------------------|-----------|------------------------|--------------------------|----------------|
| <b>Variable</b>        | <b>DF</b> | <b>F.Model</b>         | <b>R<sub>2</sub> (%)</b> | <b>P-Value</b> |
| <b>Treatment</b>       | 3         | 3.2603                 | 15.14                    | <0.001         |
| <b>Collection week</b> | 1         | 12.085                 | 14.08                    | <0.001         |
| <b>Week 4</b>          |           |                        |                          |                |
| <b>Variable</b>        | <b>DF</b> | <b>F.Model</b>         | <b>R<sub>2</sub> (%)</b> | <b>P-Value</b> |
| <b>Treatment</b>       | 3         | 11.5081                | 62.91                    | <0.001         |
| <b>Cage ID</b>         | 1         | 2.3526                 | 4.28                     | 0.083          |
| <b>Week 9</b>          |           |                        |                          |                |
| <b>Variable</b>        | <b>DF</b> | <b>F.Model</b>         | <b>R<sub>2</sub> (%)</b> | <b>P-Value</b> |
| <b>Treatment</b>       | 3         | 3.1214                 | 18.08                    | 0.003          |
| <b>Cage ID</b>         | 7         | 2.0595                 | 27.84                    | 0.005          |

**Supplementary Table 3: Permutational multivariate analysis of mice gut fungal (ITS2) taxonomic community structure.** Permutational multivariate analysis of variance stabilizing transformed community matrix testing the influence of cage ID, treatment type and collection week. P-values of statistical significance defined by PERMANOVA on Bray-Curtis distances.

| <b>Whole Dataset</b>   |           | <b>ITS2 Permutation</b> |                          |                |
|------------------------|-----------|-------------------------|--------------------------|----------------|
| <b>Variable</b>        | <b>DF</b> | <b>F.Model</b>          | <b>R<sub>2</sub> (%)</b> | <b>P-Value</b> |
| <b>Treatment</b>       | 3         | 14.308                  | 38.97                    | <0.001         |
| <b>Collection week</b> | 1         | 4.721                   | 3.28                     | 0.003          |
| <b>Week 4</b>          |           |                         |                          |                |
| <b>Variable</b>        | <b>DF</b> | <b>F.Model</b>          | <b>R<sub>2</sub> (%)</b> | <b>P-Value</b> |
| <b>Treatment</b>       | 3         | 21.7798                 | 74.25                    | <0.001         |
| <b>Cage ID</b>         | 2         | 1.8284                  | 4.15                     | 0.132          |
| <b>Week 9</b>          |           |                         |                          |                |
| <b>Variable</b>        | <b>DF</b> | <b>F.Model</b>          | <b>R<sub>2</sub> (%)</b> | <b>P-Value</b> |
| <b>Treatment</b>       | 3         | 56.206                  | 65.85                    | <0.001         |
| <b>Cage ID</b>         | 7         | 8.349                   | 22.82                    | <0.001         |

**Supplementary Table 4: Metabolites with statistically significant differences detected among gnotobiotic groups.** List of 99 metabolites with statistically significant differences in relative abundance among gnotobiotic groups. Metabolites in fecal samples were extracted in 50% methanol solution and quantified by LC-MS in a Q Exactive HF Hybrid Quadrupole-Orbitrap Mass Spectrometer coupled to a Vanquish UHPLC System (see methods). Statistically significant differences determined by ANOVA with Fisher's post-hoc FDR correction;  $P < 0.05$ .

| Compound                             | F-Value | P-Value  | -Log10(P) | FDR      |
|--------------------------------------|---------|----------|-----------|----------|
| SHIKIMATE                            | 712.72  | 3.25E-30 | 29.489    | 4.38E-28 |
| L-HISTIDINE                          | 127.89  | 2.73E-19 | 18.564    | 1.79E-17 |
| L-ASPARAGINE                         | 124.56  | 3.97E-19 | 18.401    | 1.79E-17 |
| SUCROSE                              | 111.99  | 1.80E-18 | 17.745    | 6.07E-17 |
| 5-HYDROXY-L-TRYPTOPHAN               | 97.022  | 1.36E-17 | 16.866    | 3.68E-16 |
| 3-SULFINO-L-ALANINE                  | 94.462  | 1.98E-17 | 16.703    | 4.46E-16 |
| 6-HYDROXYNICOTINATE                  | 90.622  | 3.54E-17 | 16.450    | 6.84E-16 |
| THYMIDINE                            | 87.529  | 5.76E-17 | 16.240    | 9.71E-16 |
| N-FORMYL-L-METHIONINE                | 86.743  | 6.53E-17 | 16.185    | 9.79E-16 |
| NICOTINATE                           | 84.825  | 8.91E-17 | 16.050    | 1.20E-15 |
| GUANOSINE                            | 80.509  | 1.84E-16 | 15.735    | 2.26E-15 |
| N-ACETYL-L-PHENYLALANINE             | 73.039  | 7.06E-16 | 15.151    | 7.95E-15 |
| N-ACETYL-L-ALANINE                   | 71.962  | 8.66E-16 | 15.062    | 8.46E-15 |
| L-CARNOSINE                          | 71.895  | 8.78E-16 | 15.057    | 8.46E-15 |
| STACHYOSE                            | 62.985  | 5.35E-15 | 14.272    | 4.70E-14 |
| 5-OXO-D-PROLINE                      | 62.797  | 5.57E-15 | 14.254    | 4.70E-14 |
| DEOXYCYTIDINE                        | 62.437  | 6.02E-15 | 14.220    | 4.78E-14 |
| 3-METHYL-2-OXOVALERIC ACID           | 58.466  | 1.46E-14 | 13.835    | 1.10E-13 |
| D-GLUCOSAMINE-6-PHOSPHATE            | 54.791  | 3.50E-14 | 13.456    | 2.49E-13 |
| URATE                                | 51.999  | 7.03E-14 | 13.153    | 4.55E-13 |
| 4-METHYL-2-OXO-PENTANOIC ACID        | 51.969  | 7.08E-14 | 13.150    | 4.55E-13 |
| D-RAFFINOSE                          | 51.632  | 7.73E-14 | 13.112    | 4.74E-13 |
| L-ASPARTATE                          | 50.066  | 1.16E-13 | 12.935    | 6.82E-13 |
| ADENINE                              | 48.540  | 1.75E-13 | 12.757    | 9.85E-13 |
| L-GLUTAMINE                          | 41.542  | 1.34E-12 | 11.873    | 7.23E-12 |
| MANNITOL                             | 39.503  | 2.56E-12 | 11.592    | 1.33E-11 |
| L-SERINE                             | 36.829  | 6.27E-12 | 11.203    | 3.13E-11 |
| L-LYSINE                             | 36.149  | 7.94E-12 | 11.100    | 3.83E-11 |
| 4-HYDROXYBENZOATE                    | 35.757  | 9.11E-12 | 11.040    | 4.19E-11 |
| N-ACETYL-DL-GLUTAMIC ACID            | 35.698  | 9.30E-12 | 11.031    | 4.19E-11 |
| THYMINE                              | 34.790  | 1.29E-11 | 10.890    | 5.61E-11 |
| N-ALPHA-ACETYL-L-ASPARAGINE          | 32.512  | 3.01E-11 | 10.522    | 1.27E-10 |
| ITACONATE                            | 31.191  | 5.03E-11 | 10.299    | 2.06E-10 |
| L-ORNITHINE                          | 28.390  | 1.59E-10 | 9.7981    | 6.32E-10 |
| L-ARGININE                           | 28.185  | 1.74E-10 | 9.7599    | 6.71E-10 |
| XANTHOSINE                           | 28.062  | 1.83E-10 | 9.7369    | 6.87E-10 |
| TAURINE                              | 27.225  | 2.64E-10 | 9.5781    | 9.64E-10 |
| 4-HYDROXY-2-QUINOLINECARBOXYLIC ACID | 25.413  | 6.02E-10 | 9.2204    | 2.14E-09 |

| Compound (Suppl. Table 4 continued) | F-Value | P-Value    | -Log10(P) | FDR       |
|-------------------------------------|---------|------------|-----------|-----------|
| SUCCINATE                           | 24.363  | 9.91E-10   | 9.0038    | 3.43E-09  |
| L-ARABITOL                          | 22.336  | 2.73E-09   | 8.5644    | 9.20E-09  |
| 5-DEOXYADENOSINE                    | 21.599  | 4.01E-09   | 8.3971    | 1.32E-08  |
| N-ACETYL-GLUTAMINE                  | 19.308  | 1.42E-08   | 7.8478    | 4.56E-08  |
| L-CYSTEINE                          | 18.512  | 2.26E-08   | 7.6456    | 7.10E-08  |
| CYTIDINE                            | 17.608  | 3.91E-08   | 7.4084    | 1.20E-07  |
| URACIL                              | 16.126  | 1.00E-07   | 6.9999    | 3.00E-07  |
| BIOTIN                              | 15.928  | 1.14E-07   | 6.9432    | 3.34E-07  |
| URIDINE                             | 15.145  | 1.93E-07   | 6.7146    | 5.54E-07  |
| DEOXYURIDINE                        | 14.147  | 3.88E-07   | 6.4114    | 1.09E-06  |
| INOSINE                             | 14.122  | 3.95E-07   | 6.4037    | 1.09E-06  |
| NALPHA-ACETYL-L-LYSINE              | 13.628  | 5.65E-07   | 6.2482    | 1.52E-06  |
| 2-DEOXYADENOSINE                    | 12.995  | 9.05E-07   | 6.0436    | 2.39E-06  |
| N-ACETYL-L-LEUCINE                  | 12.766  | 1.08E-06   | 5.9676    | 2.77E-06  |
| S-CARBOXYMETHYL-L-CYSTEINE          | 12.755  | 1.09E-06   | 5.9642    | 2.77E-06  |
| XANTHINE                            | 11.142  | 3.94E-06   | 5.4050    | 9.84E-06  |
| GLUCOSAMINATE                       | 10.722  | 5.61E-06   | 5.2514    | 1.38E-05  |
| L-CYSTATHIONINE                     | 10.501  | 6.77E-06   | 5.1693    | 1.63E-05  |
| N-ACETYL-D-TRYPTOPHAN               | 9.8940  | 1.15E-05   | 4.9381    | 2.73E-05  |
| L-THREONINE                         | 9.4238  | 1.76E-05   | 4.7534    | 4.11E-05  |
| N-ACETYL-L-THREONINE                | 8.8196  | 3.10E-05   | 4.5085    | 7.07E-05  |
| N-METHYL-D-ASPARTIC ACID            | 8.8062  | 3.14E-05   | 4.5029    | 7.07E-05  |
| PTERIN                              | 7.7336  | 9.02E-05   | 4.0449    | 0.0001996 |
| D-GLUCURONIC ACID                   | 7.5490  | 0.0001089  | 3.9630    | 0.0002371 |
| SN-GLYCEROL-3-PHOSPHATE             | 7.1176  | 0.0001708  | 3.7675    | 0.0003660 |
| FUMARATE                            | 7.0042  | 0.0001926  | 3.7152    | 0.0004064 |
| CREATINE                            | 6.9724  | 0.0001993  | 3.7005    | 0.0004139 |
| 4-IMIDAZOLEACETIC ACID              | 6.9282  | 0.00020895 | 3.6800    | 0.0004274 |
| L-ALANINE                           | 6.8943  | 0.00021668 | 3.6642    | 0.0004366 |
| D-GLUCOSE-6-PHOSPHATE               | 6.8636  | 0.00022397 | 3.6498    | 0.0004446 |
| N-ACETYL-DL-SERINE                  | 6.7970  | 0.00024062 | 3.6187    | 0.0004708 |
| DOCOSAHEXAENOIC ACID                | 6.5938  | 0.00030014 | 3.5227    | 0.0005729 |
| GUANINE                             | 6.5903  | 0.00030131 | 3.5210    | 0.0005729 |
| DL-5-HYDROXYLYSINE                  | 6.5541  | 0.00031351 | 3.5038    | 0.0005878 |
| XANTHURENIC ACID                    | 6.4717  | 0.00034331 | 3.4643    | 0.0006349 |
| L-TYROSINE                          | 6.2399  | 0.00044433 | 3.3523    | 0.0008010 |
| MALEIC ACID                         | 6.2386  | 0.00044497 | 3.3517    | 0.0008010 |
| 3-METHYLADENINE                     | 5.9952  | 0.00058598 | 3.2321    | 0.0010409 |
| OPHTHALMIC ACID                     | 5.8025  | 0.00073105 | 3.1361    | 0.0012817 |
| 3-UREIDOPROPIONATE                  | 5.6646  | 0.00085799 | 3.0665    | 0.0014848 |
| THYMIDINE-5-MONOPHOSPHATE           | 5.6538  | 0.00086889 | 3.0610    | 0.0014848 |
| L-CYSTEIC ACID                      | 5.5149  | 0.0010226  | 2.9903    | 0.0017069 |
| L-LEUCINE                           | 5.5137  | 0.0010241  | 2.9896    | 0.0017069 |
| SUBERIC ACID                        | 5.4937  | 0.0010485  | 2.9794    | 0.0017262 |
| L-GLUTAMIC ACID                     | 5.4328  | 0.0011268  | 2.9481    | 0.0018328 |
| 2-METHYLMALEATE                     | 4.9243  | 0.0020812  | 2.6817    | 0.0033447 |

| <b>Compound (Suppl. Table 4 continued)</b> | <b>F-Value</b> | <b>P-Value</b> | <b>-Log10(P)</b> | <b>FDR</b> |
|--------------------------------------------|----------------|----------------|------------------|------------|
| L-PHENYLALANINE                            | 4.7888         | 0.0024600      | 2.6091           | 0.0039071  |
| HYPOXANTHINE                               | 4.7512         | 0.0025775      | 2.5888           | 0.0040276  |
| DEHYDROASCORBATE                           | 4.7456         | 0.0025956      | 2.5858           | 0.0040276  |
| D-PANTOTHENIC ACID                         | 4.6444         | 0.0029448      | 2.5309           | 0.0045152  |
| N-ACETYL-DL-METHIONINE                     | 4.6358         | 0.0029767      | 2.5263           | 0.0045152  |
| ALPHA-D-GLUCOSE-1-PHOSPHATE                | 4.5955         | 0.0031311      | 2.5043           | 0.0046966  |
| L-METHIONINE                               | 4.3213         | 0.0044328      | 2.3533           | 0.0065761  |
| 3-HYDROXYBUTANOIC ACID                     | 4.0014         | 0.0067064      | 2.1735           | 0.0098410  |
| 4-GUANIDINOBUTANOATE                       | 3.6778         | 0.0102880      | 1.9877           | 0.0149340  |
| FERULATE                                   | 3.5359         | 0.0124450      | 1.9050           | 0.0178740  |
| INDOLE-3-ACETIC ACID                       | 3.4546         | 0.0138920      | 1.8572           | 0.0197410  |
| AZELAIC ACID                               | 3.4000         | 0.0149600      | 1.8251           | 0.0210380  |
| TRANS-CINNAMALDEHYDE                       | 3.1908         | 0.0199190      | 1.7007           | 0.0277220  |
| N-AMIDINO-L-ASPARTATE                      | 3.0241         | 0.0250830      | 1.6006           | 0.0345530  |
| L-TRYPTOPHAN                               | 2.8945         | 0.0300480      | 1.5222           | 0.0409750  |

**Supplementary Table 5: Metabolites with statistically significant differences detected between Y and GF gnotobiotic groups.** List of 22 metabolites with statistically significant differences in relative abundance between Y and GF groups. Statistically significant differences determined by Two-Sided T-test with FDR correction;  $P < 0.05$ .

| <b>Compound</b>          | <b>T-Stat</b> | <b>P-Value</b> | <b>-Log10(P)</b> | <b>FDR</b> |
|--------------------------|---------------|----------------|------------------|------------|
| NICOTINIC ACID           | -25.689       | 2.29E-07       | 6.6395           | 2.98E-05   |
| 3-HYDROXYBUTYRIC ACID    | -8.1624       | 0.000182       | 3.7400           | 0.011828   |
| FUMARIC ACID             | -6.6632       | 0.000553       | 3.2575           | 0.023949   |
| L-ASPARAGINE             | 5.8051        | 0.001146       | 2.9408           | 0.032220   |
| KETOLEUCINE              | 5.6874        | 0.001275       | 2.8946           | 0.032220   |
| INDOLEACETIC ACID        | -5.5199       | 0.001487       | 2.8277           | 0.032220   |
| ACETYLLALANINE           | 5.3291        | 0.001780       | 2.7496           | 0.033052   |
| THYMINE                  | -5.0012       | 0.002449       | 2.6109           | 0.037887   |
| CARNOSINE                | 4.9327        | 0.002623       | 2.5812           | 0.037887   |
| 6-HYDROXYNICOTINIC ACID  | 4.7618        | 0.003121       | 2.5058           | 0.039944   |
| SUCCINIC ACID            | -4.6555       | 0.003484       | 2.4580           | 0.039944   |
| L-GLUTAMIC ACID          | 4.5445        | 0.003915       | 2.4073           | 0.039944   |
| URIDINE                  | 4.4241        | 0.004451       | 2.3515           | 0.039944   |
| N-ACETYL-D-TRYPTOPHAN    | 4.4194        | 0.004474       | 2.3493           | 0.039944   |
| L-SERINE                 | 4.3764        | 0.004686       | 2.3292           | 0.039944   |
| UROCANIC ACID            | 4.3323        | 0.004916       | 2.3084           | 0.039944   |
| DOCOSAHEXAENOIC ACID     | 4.1881        | 0.005761       | 2.2395           | 0.042696   |
| SHIKIMIC ACID            | 4.1649        | 0.005912       | 2.2283           | 0.042696   |
| SUBERIC ACID             | 4.0754        | 0.006536       | 2.1847           | 0.044720   |
| CITRACONIC ACID          | 4.0233        | 0.006933       | 2.1591           | 0.045064   |
| L-CYSTATHIONINE          | -3.9504       | 0.007534       | 2.1230           | 0.046639   |
| N-ACETYL-L-PHENYLALANINE | 3.8837        | 0.008136       | 2.0896           | 0.048077   |

## References (Supplementary Table 1):

1. Brugiroux, S. *et al.* Genome-guided design of a defined mouse microbiota that confers colonization resistance against *Salmonella enterica* serovar *Typhimurium*. *Nat Microbiol* **2**, 16215 (2016).
2. Nguyen, N.H. *et al.* FUNGuild: An open annotation tool for parsing fungal community datasets by ecological guild. *Fungal Ecol* **20**, 241-248 (2016).
3. Nadkarni, M.A., Martin, F.E., Jacques, N.A. & Hunter, N. Determination of bacterial load by real-time PCR using a broad-range (universal) probe and primers set. *Microbiology* **148**, 257-266 (2002).
4. Prevost-Boure, N.C. *et al.* Validation and application of a PCR primer set to quantify fungal communities in the soil environment by real-time quantitative PCR. *PLoS One* **6**, e24166 (2011).
5. Zhang J. *et al.* Development of *Candida*-specific real-time PCR assays for the detection and identification of eight medically important *Candida* species. *Microbiol Insights* **9**, 21-8.
6. Díaz C. *et al.* Characterization and dynamic behavior of wild yeast during spontaneous wine fermentation in steel tanks and amphorae. *Biomed Res Int* **2013**, 540465 (2013).
